# Supplementary material for: Flocculation of Cellulose Microfiber and Nanofiber Induced by Chitosan–Xylan Complexes
Source: MDPI journal article supplement (doi:10.3390/nano13172420), 2023-08-25
Supplement: s1 [file s1]

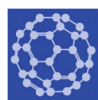

## Article

# Flocculation of Cellulose Microfiber and Nanofiber Induced by Chitosan-Xylan complexes.

Gabriela Adriana Bastida <sup>1,2</sup>, Quim Tarrés <sup>2</sup>, Roberto Aguado <sup>2</sup>, Marc Delgado-Aguilar <sup>2</sup>, Miguel Ángel Zanuttini <sup>1</sup> and María Verónica Galván <sup>1</sup>

<sup>1</sup> Institute of Cellulosic Technology, Faculty of Chemical Engineering (FIQ-CONICET), National University of the Litoral, Santiago del Estero 2654, Santa Fe S3000AOJ, Argentina.

<sup>2</sup> LEPAMAP-PRODIS research group, University of Girona. Maria Aurèlia Capmany, 61 – 17003 Girona (Spain)

\* Correspondence: ejoaquimagusti.tarres@udg.edu; Tel.:

This file includes Supplementary Figure S1, S2 and S3. Table S1, S2 and S3

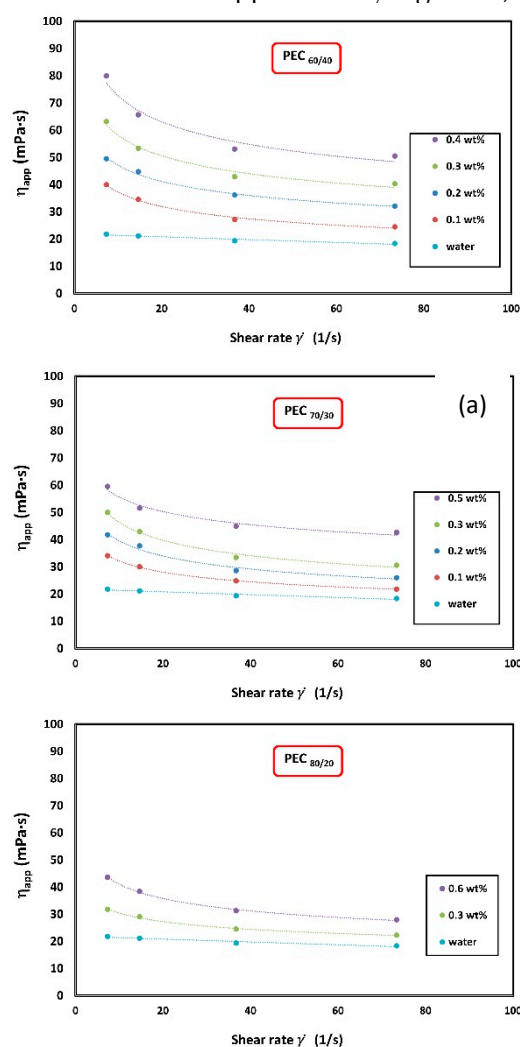

**Citation:** Lastname, F.; Lastname, F.; Lastname, F. Title. *Nanomaterials* **2022**, *12*, x. <https://doi.org/10.3390/xxxxx>

Academic Editor: Firstname Last-name

Received: date

Accepted: date

Published: date

**Publisher's Note:** MDPI stays neutral with regard to jurisdictional claims in published maps and institutional affiliations.

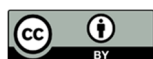

**Copyright:** © 2022 by the authors. Submitted for possible open access publication under the terms and conditions of the Creative Commons Attribution (CC BY) license (<https://creativecommons.org/licenses/by/4.0/>).

**Figure S1.** Apparent viscosity ( $\eta_{app}$ ) versus shear rate (7.34; 14.68; 36.69 and 73.38 1/s) and different concentration (from 0.1 wt% to 0.6 wt%) for complexes (PECs) at different mass ratio Xyl/Ch: (a) 60/40; (b) 70/30 and (c) 80/20. Temperature: 25 °C.

**Table S1.** Rheological parameters of PECs at different concentration using the Power Law model.

| Samples              | Concentration (wt %) | K (1(mPa·s)) | n     | R <sup>2</sup> |
|----------------------|----------------------|--------------|-------|----------------|
| PEC <sub>60/40</sub> | 0.1                  | 61.8         | 0.780 | 0.9917         |
|                      | 0.2                  | 73.8         | 0.806 | 0.9933         |
|                      | 0.3                  | 92.4         | 0.799 | 0.9727         |
|                      | 0.4                  | 116.3        | 0.796 | 0.9563         |
| PEC <sub>70/30</sub> | 0.1                  | 50.4         | 0.805 | 0.9995         |
|                      | 0.2                  | 65.5         | 0.781 | 0.9785         |
|                      | 0.3                  | 77.2         | 0.779 | 0.9853         |
|                      | 0.5                  | 77.8         | 0.855 | 0.9679         |
| PEC <sub>80/20</sub> | 0.3                  | 43.9         | 0.841 | 0.9955         |
|                      | 0.6                  | 64.7         | 0.803 | 0.9967         |

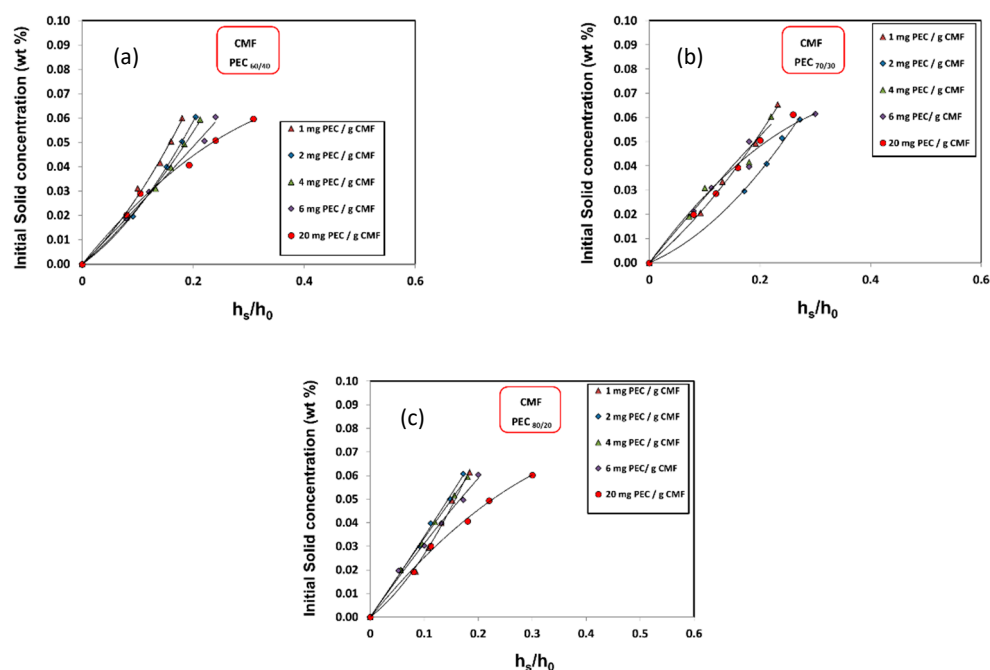**Figure S2.** Initial solid concentration of CMF vs final sediment height ( $h_s$ ) / initial ( $h_0$ ) height of suspension.

**Table S2.** Sedimentation data of CMF fitted with a quadratic equation and gel point.

| Sample               | Dosage of PEC<br>(mg PEC / g<br>CMF) | $Y = Ax^2 + Bx$ (*)        | $R^2$          | Gel Point<br>(wt %) (**) |
|----------------------|--------------------------------------|----------------------------|----------------|--------------------------|
| PEC <sub>60/40</sub> | 1                                    | $Y = 0.6341x^2 + 0.2163x$  | $R^2 = 0.9931$ | 0.2163                   |
|                      | 2                                    | $Y = 0.6549x^2 + 0.1629x$  | $R^2 = 0.9995$ | 0.1629                   |
|                      | 4                                    | $Y = 0.4142x^2 + 0.1895x$  | $R^2 = 0.9963$ | 0.1895                   |
|                      | 6                                    | $Y = 0.0403x^2 + 0.2337x$  | $R^2 = 0.9943$ | 0.2337                   |
|                      | 20                                   | $Y = -0.2888x^2 + 0.2807x$ | $R^2 = 0.9935$ | 0.2807                   |
| PEC <sub>70/30</sub> | 1                                    | $Y = 0.3785x^2 + 0.1908x$  | $R^2 = 0.9979$ | 0.1908                   |
|                      | 2                                    | $Y = 0.4561x^2 + 0.0971x$  | $R^2 = 0.9976$ | 0.0971                   |
|                      | 4                                    | $Y = -0.083x^2 + 0.2783x$  | $R^2 = 0.9711$ | 0.2783                   |
|                      | 6                                    | $Y = -0.3534x^2 + 0.3115x$ | $R^2 = 0.9767$ | 0.3115                   |
|                      | 20                                   | $Y = -0.0698x^2 + 0.2570x$ | $R^2 = 0.9976$ | 0.2570                   |
| PEC <sub>80/20</sub> | 1                                    | $Y = 0.8793x^2 + 0.1785x$  | $R^2 = 0.9959$ | 0.1785                   |
|                      | 2                                    | $Y = 0.0993x^2 + 0.3320x$  | $R^2 = 0.9974$ | 0.3320                   |
|                      | 4                                    | $Y = -0.0594x^2 + 0.3405x$ | $R^2 = 0.9989$ | 0.3405                   |
|                      | 6                                    | $Y = -0.1773x^2 + 0.3294x$ | $R^2 = 0.9933$ | 0.3294                   |
|                      | 20                                   | $Y = -0.2633x^2 + 0.2799x$ | $R^2 = 0.9963$ | 0.2799                   |

\* Y is initial solid concentration and X is  $(h_s)/(h_0)$ . \*\* The first derivate of the curve at the y-intercept gives the gel point.

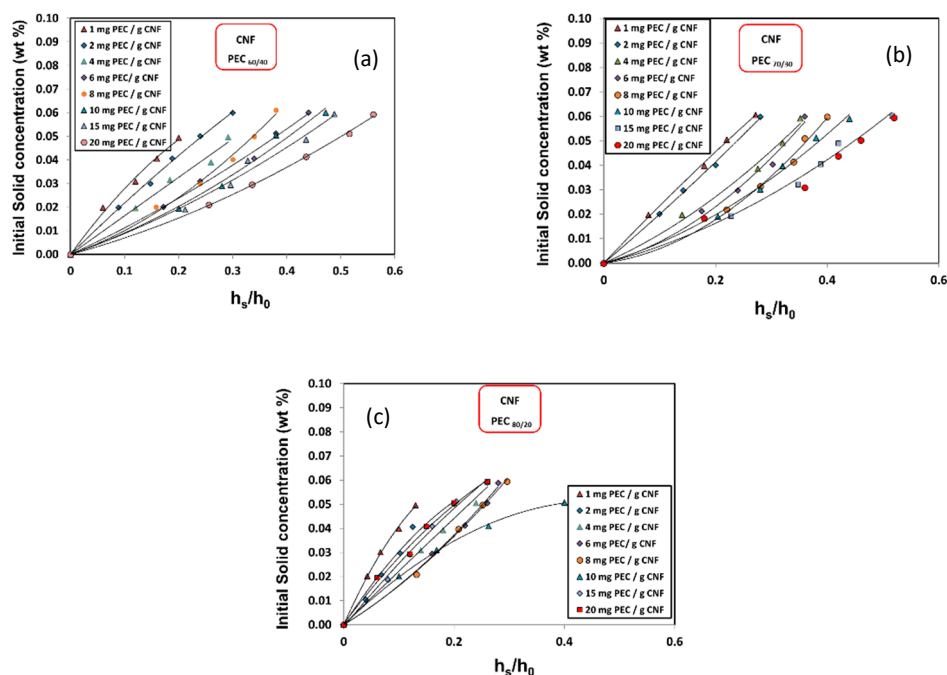**Figure S3.** Initial solid concentration of CNF vs final sediment height ( $h_s$ ) / initial ( $h_0$ ) height of suspension.

**Table S3.** Sedimentation data of CNF fitted with a quadratic equation and gel point.

| Sample               | Dosage of PEC<br>(mg PEC / g CNF) | $Y = Ax^2 + Bx$ (*)        | $R^2$  | Gel point<br>(wt %) (**) |
|----------------------|-----------------------------------|----------------------------|--------|--------------------------|
| PEC <sub>60/40</sub> | 1                                 | $y = -0.3517x^2 + 0.3135x$ | 0.9940 | 0.3135                   |
|                      | 2                                 | $y = -0.0826x^2 + 0.2258x$ | 0.9981 | 0.2258                   |
|                      | 4                                 | $y = -0.0022x^2 + 0.1636x$ | 0.9876 | 0.1636                   |
|                      | 6                                 | $y = 0.1999x^2 + 0.0806x$  | 0.9948 | 0.0806                   |
|                      | 8                                 | $y = 0.0686x^2 + 0.1054x$  | 0.9938 | 0.1054                   |
|                      | 10                                | $y = 0.1094x^2 + 0.0797x$  | 0.9880 | 0.0797                   |
|                      | 15                                | $y = 0.0838x^2 + 0.0798x$  | 0.9868 | 0.0798                   |
|                      | 20                                | $y = 0.0760x^2 + 0.0618x$  | 0.9992 | 0.0618                   |
| PEC <sub>70/30</sub> | 1                                 | $Y = -0.0447x^2 + 0.2347x$ | 0.9976 | 0.2347                   |
|                      | 2                                 | $Y = 0.0257x^2 + 0.2043x$  | 0.9959 | 0.2043                   |
|                      | 4                                 | $Y = 0.1917x^2 + 0.0957x$  | 0.9884 | 0.0957                   |
|                      | 6                                 | $Y = 0.2601x^2 + 0.0668x$  | 0.9876 | 0.0668                   |
|                      | 8                                 | $Y = 0.2989x^2 + 0.0289x$  | 0.9942 | 0.0289                   |
|                      | 10                                | $Y = 0.1647x^2 + 0.0658x$  | 0.9933 | 0.0658                   |
|                      | 15                                | $Y = 0.1199x^2 + 0.0576x$  | 0.9908 | 0.0576                   |
|                      | 20                                | $Y = 0.0916x^2 + 0.0651x$  | 0.9860 | 0.0651                   |
| PEC <sub>80/20</sub> | 1                                 | $Y = -1.0331x^2 + 0.5125x$ | 0.9989 | 0.5125                   |
|                      | 2                                 | $Y = -0.4768x^2 + 0.3511x$ | 0.9837 | 0.3511                   |
|                      | 4                                 | $Y = -0.0174x^2 + 0.2119x$ | 0.9958 | 0.2119                   |
|                      | 6                                 | $Y = 0.2303x^2 + 0.1403x$  | 0.9969 | 0.1403                   |
|                      | 8                                 | $Y = 0.2129x^2 + 0.1408x$  | 0.9980 | 0.1408                   |
|                      | 10                                | $Y = -0.2376x^2 + 0.2212x$ | 0.9992 | 0.2212                   |
|                      | 15                                | $Y = -0.1450x^2 + 0.2697x$ | 0.9943 | 0.2697                   |
|                      | 20                                | $Y = -0.3063x^2 + 0.3099x$ | 0.9923 | 0.3099                   |

\* Y is initial solid concentration and X is  $(h_s)/(h_0)$ . \*\* The first derivate of the curve at the y-intercept gives the gel point.
